# Supplementary material for: Atomic origins of the strong metal–support interaction in silica supported catalysts
Source: Royal Society of Chemistry journal article supplement (doi:10.1039/d1sc03480d), 2021-01-01
Supplement: d1sc03480d1.pdf [file d1sc03480d1.pdf]

# Origins of Strong Metal-Support Interactions in Silica Supported Metal Catalysts

Chemical  
Science

**Strong metal-support interaction (SMSI) is seen in metal oxide supported catalysts and affects their behaviour**

**Atomic-scale observations of SMSI in Co/SiO<sub>2</sub> catalyst**

-  Reductive atmosphere
-  Pressure: 50 Pa
-  Temperature: 750°C

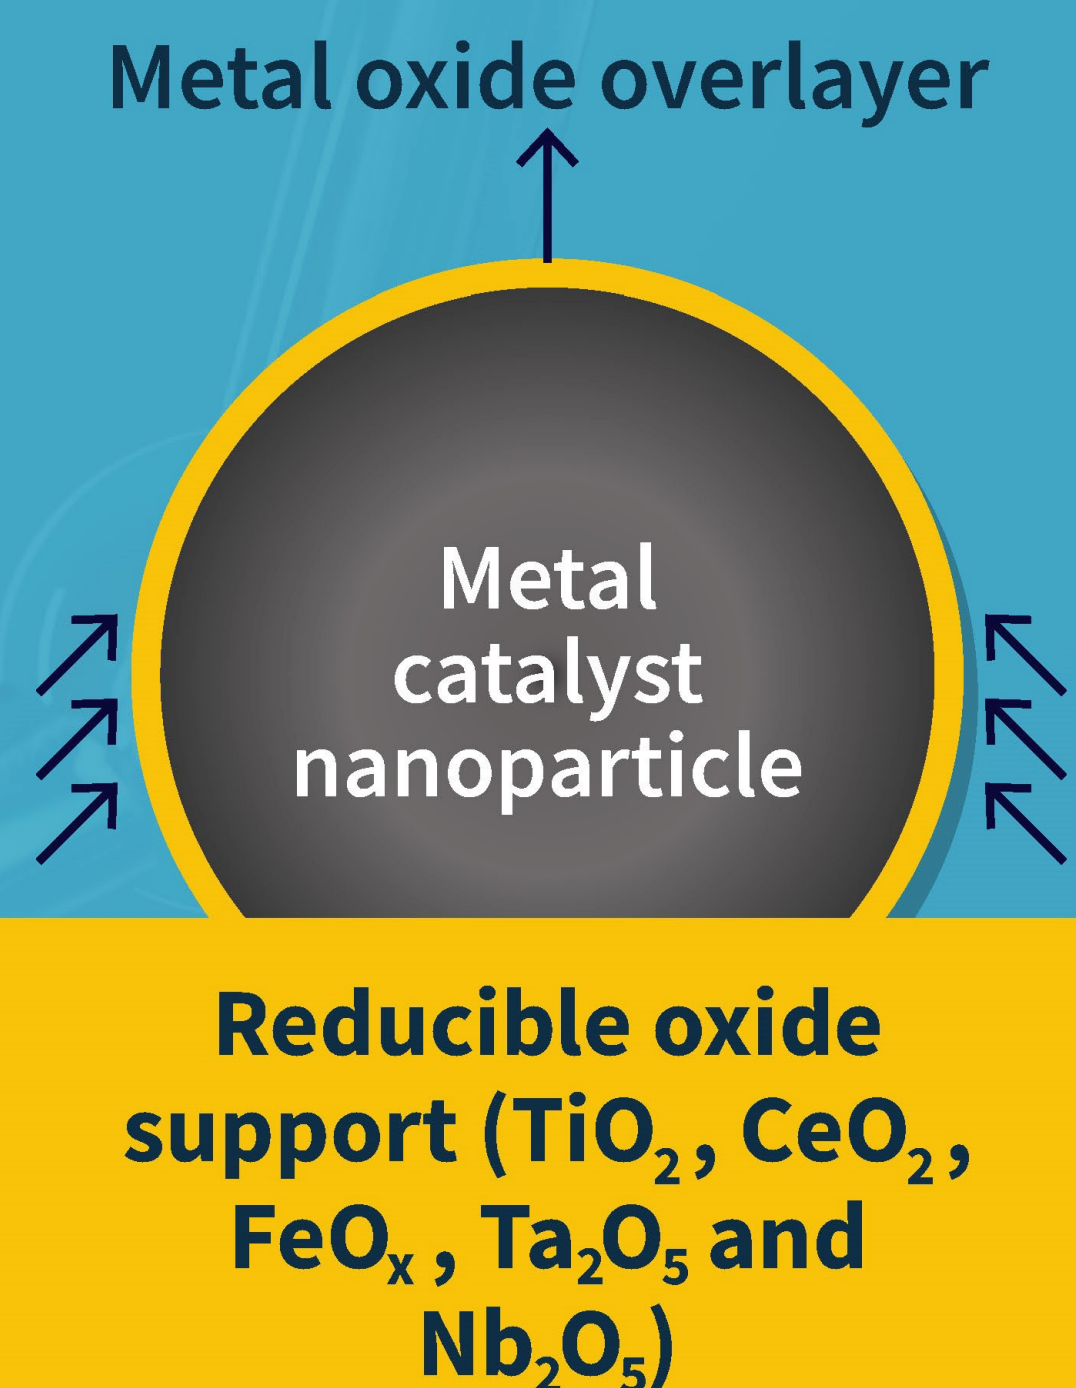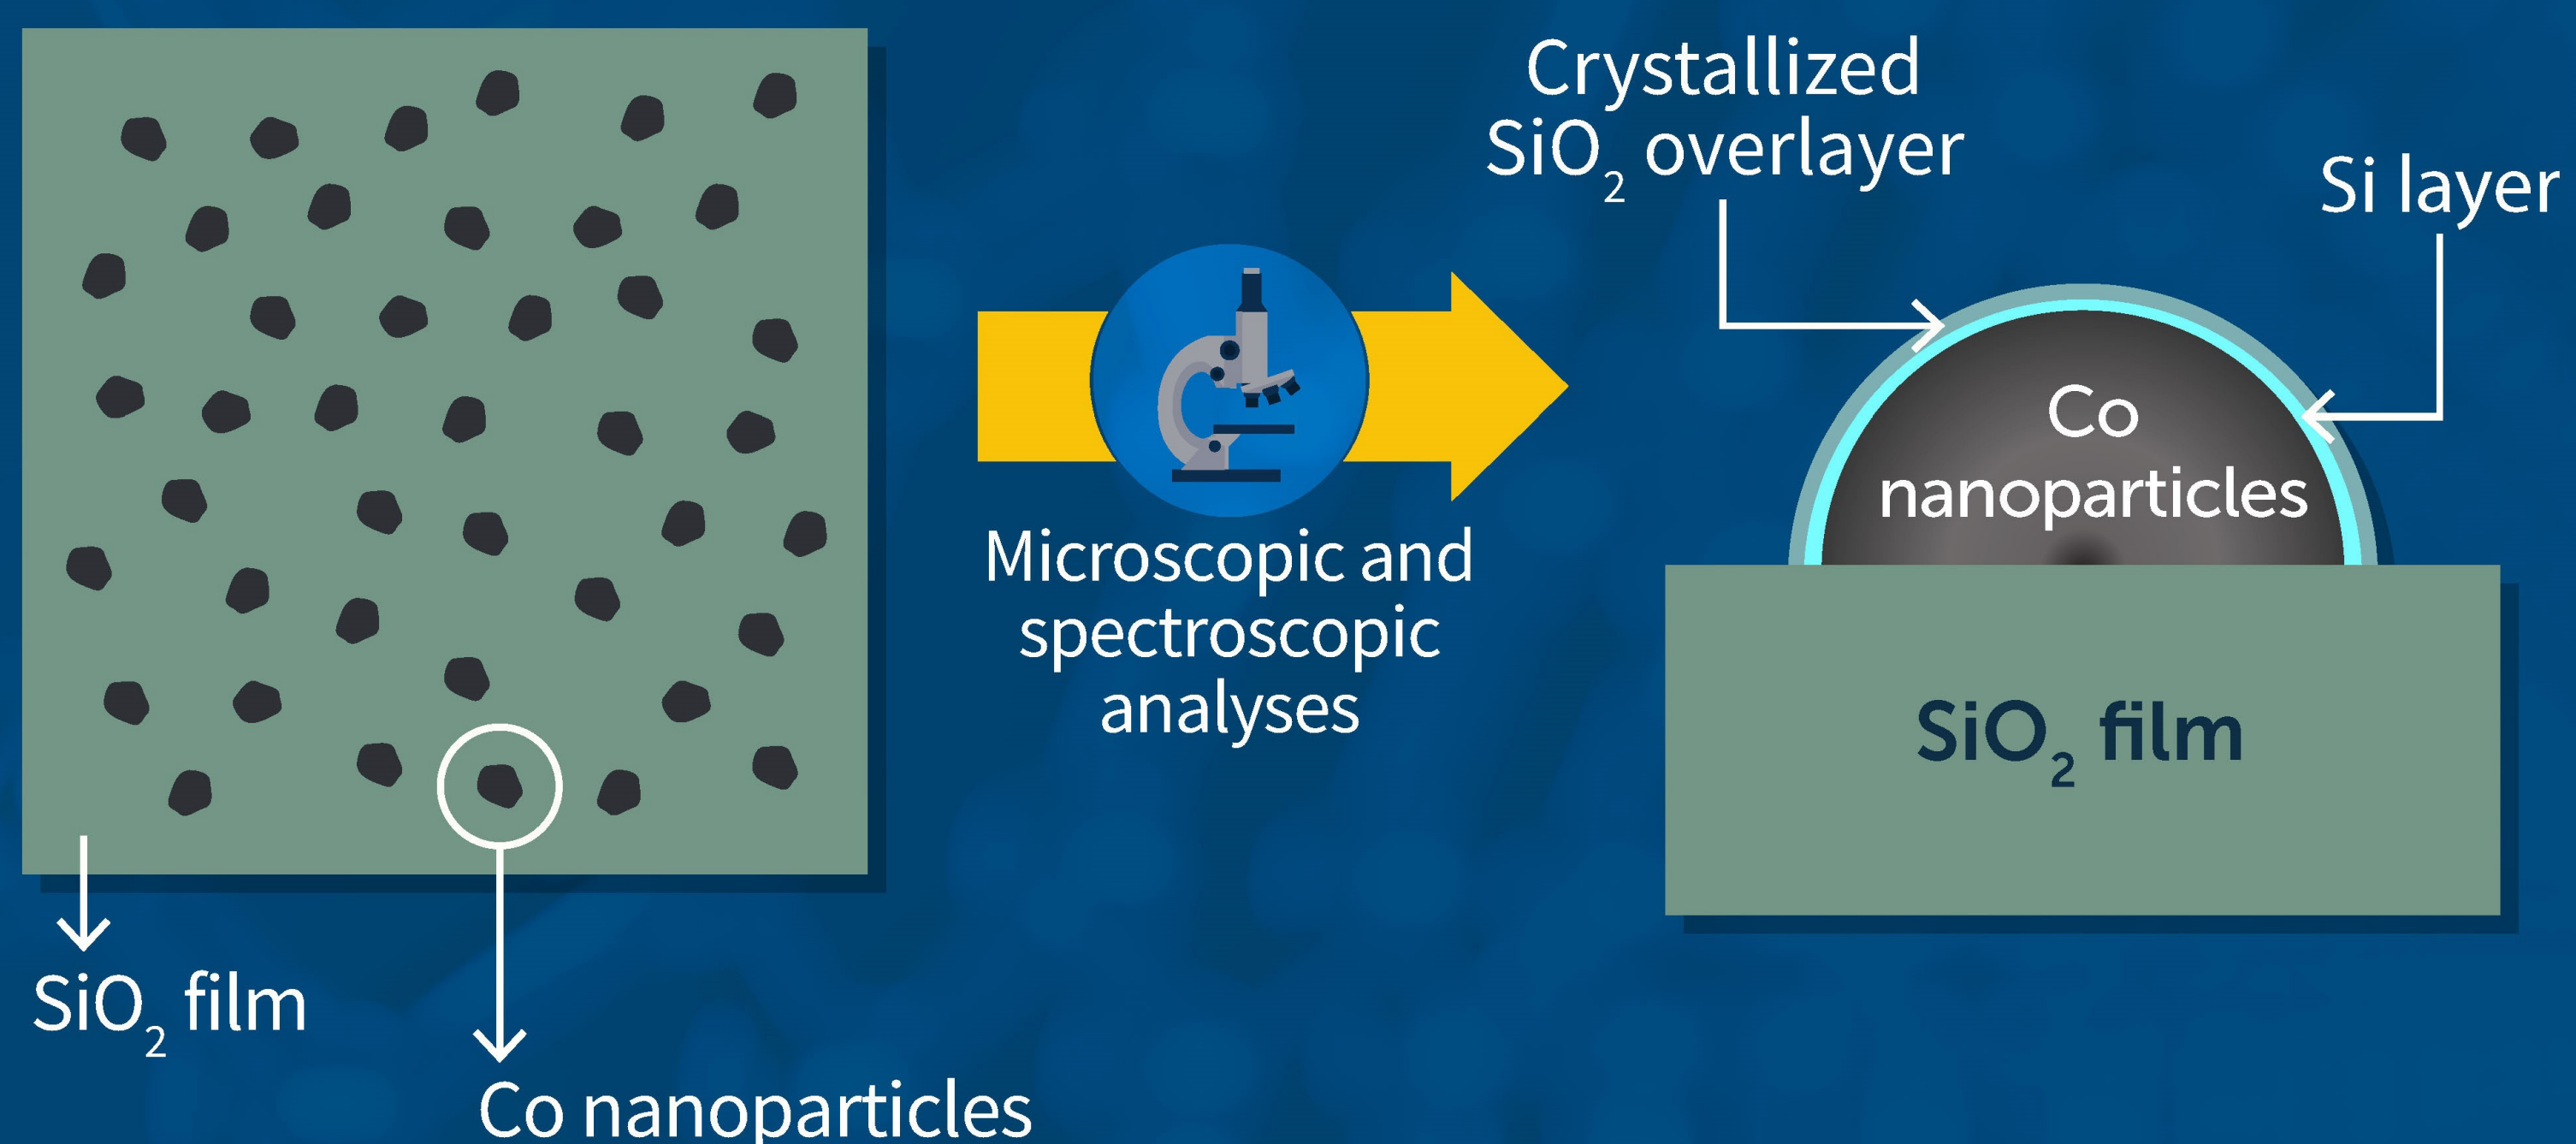

Migration of SiO<sub>2</sub> to Co surface to form quartz SiO<sub>2</sub> overlayer

Partial reduction of SiO<sub>2</sub> to Si and formation of SiO<sub>2</sub>-Si-Co interface

Diffusion of Si in Co to form Co-Si alloy

**SMSI is rarely observed between hard-to-reduce oxide supports (SiO<sub>2</sub>, MgO, ZnO) and metal nanoparticles**

**The confirmation of SMSI interactions in SiO<sub>2</sub> - supported metal catalysts will aid in future catalyst design**
