# Supplementary material for: Atomic origins of the strong metal–support interaction in silica supported catalysts
Source: Royal Society of Chemistry journal article supplement (doi:10.1039/d1sc03480d), 2021-01-01
Supplement: d1sc03480d2.pdf [file d1sc03480d2.pdf]

## Supporting Information

### Atomic Origins of Strong Metal-Support Interaction in Silica Supported Catalysts

Feng Yang<sup>#</sup>, Haofei Zhao<sup>#</sup>, Wu Wang<sup>#</sup>, Lei Wang, Lei Zhang, Tianhui Liu, Jian Sheng, Sheng Zhu, Dongsheng He, Lili Lin, Jiaqing He\*, Rongming Wang\* and Yan Li\*

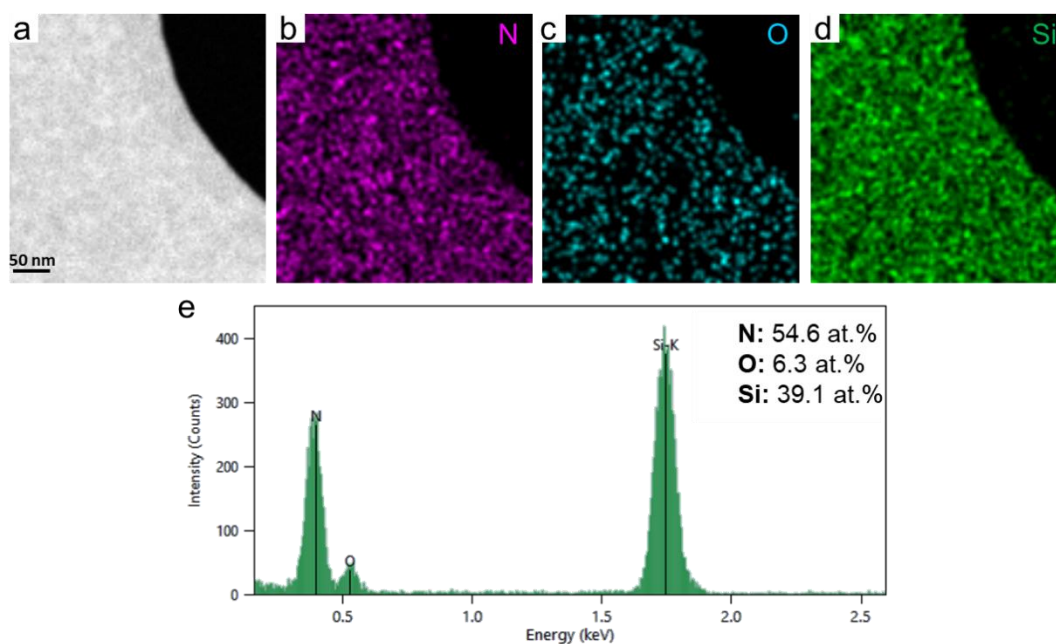

**Figure S1.** a–d, STEM image (a) and EDX elemental mapping on pristine ETEM chip showing a thin-film of SiO<sub>2</sub> on SiN<sub>x</sub> membrane (b–d). e, Corresponding EDX spectrum. The relative abundance of N, O, and Si were also shown.

**Table S1.** Quantitative analysis of N, O, and Si by EDX mapping on six regions of pristine ETEM chip.

| Region No. | N (at.%) | O (at.%) | Si (at.%) |
|------------|----------|----------|-----------|
| 1          | 54.6     | 6.5      | 39.9      |
| 2          | 54.1     | 6.0      | 39.9      |
| 3          | 54.1     | 5.4      | 40.5      |
| 4          | 53.7     | 5.8      | 40.5      |
| 5          | 54.4     | 6.6      | 39.0      |
| 6          | 53.6     | 6.0      | 40.4      |
| Average    | 54.0     | 6.0      | 40.0      |

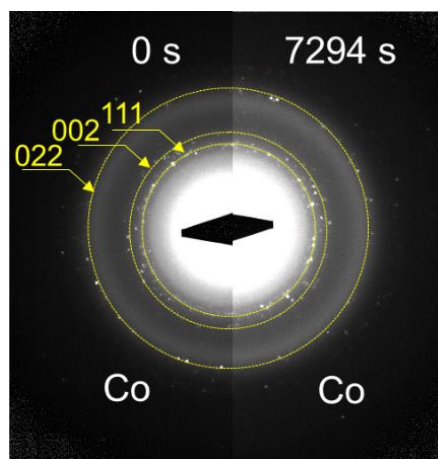

**Figure S2.** SAED patterns of Co nanoparticle before (0 s) and after annealing (7294 s). The SAED was acquired *in-situ* at 750 °C.

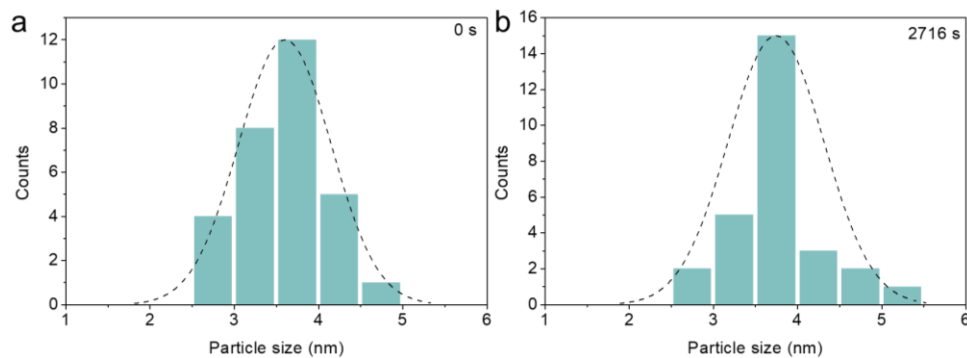

**Figure S3.** Size distribution of Co nanoparticles on carbon substrate derived from ETEM images acquired at relative time: **a**, 0 s, **b**, 2716 s.

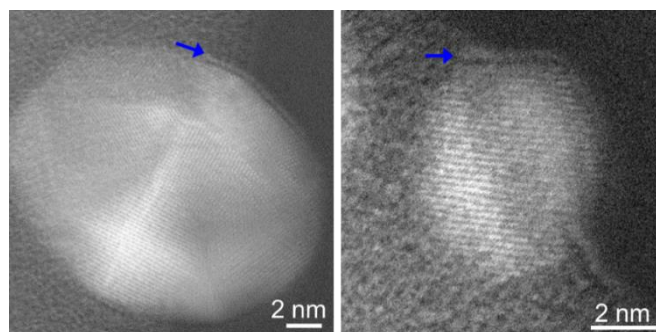

**Figure S4.** *In-situ* HAADF-STEM images of Co nanoparticles with overlayer on the edge of substrate under 3% H<sub>2</sub>/Ar.

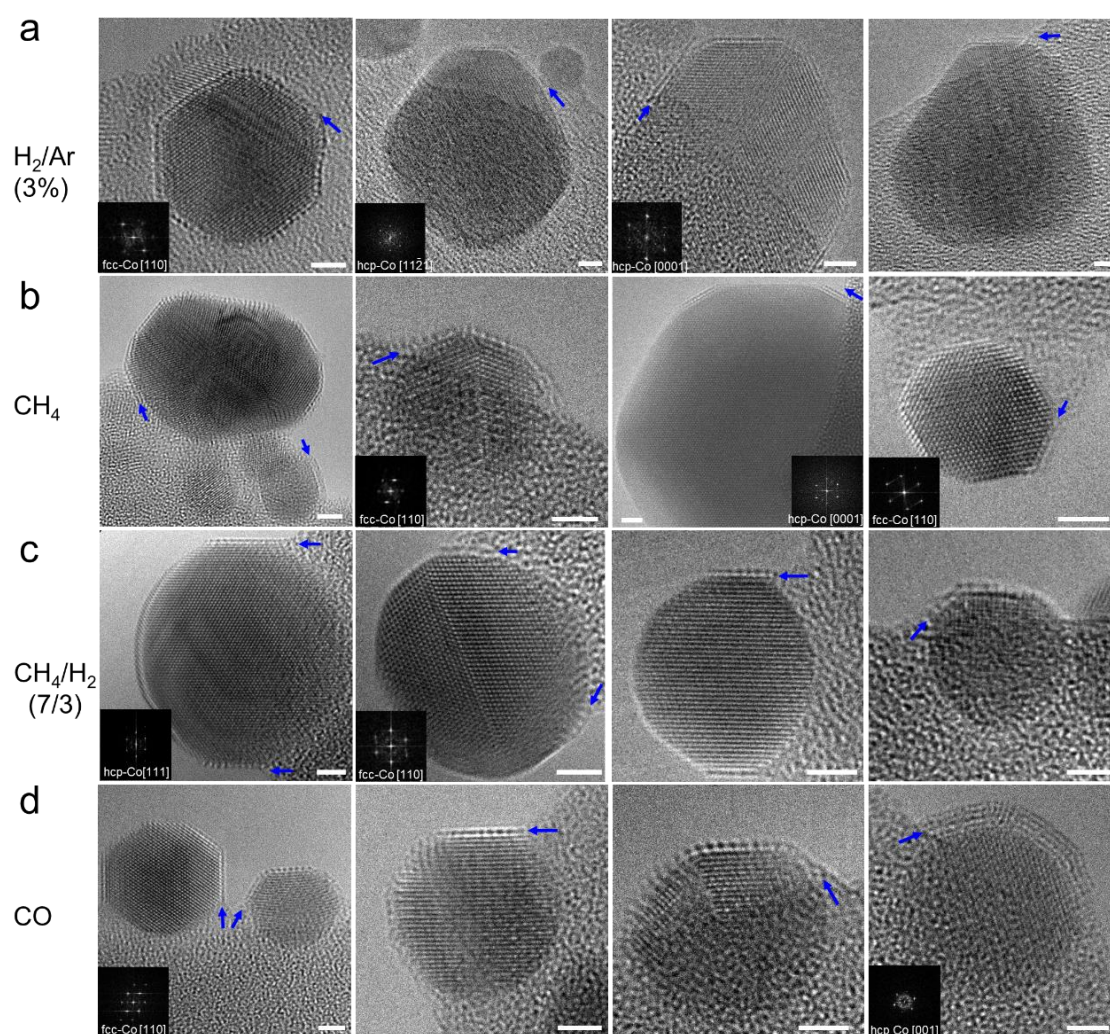

**Figure S5.** ETEM images of Co nanocrystals with overlayer obtained in different conditions at 750 °C: **a**, 3% H<sub>2</sub>/Ar. **b**, CH<sub>4</sub>. **c**, CH<sub>4</sub>/H<sub>2</sub> (v/v=7/3), **d**, CO. The overlayer were indicated by arrows. All scale bars: 2 nm. Typical FFT patterns of fcc and hcp-Co were also shown in TEM images.

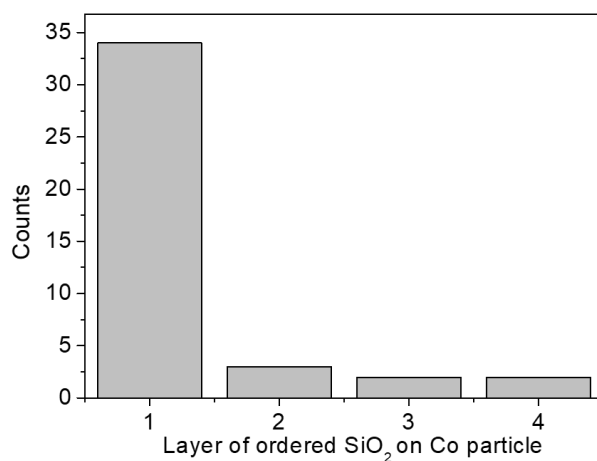

**Figure S6.** Statistical analysis of layer of ordered SiO<sub>2</sub> covered on Co nanoparticles derived from TEM images.

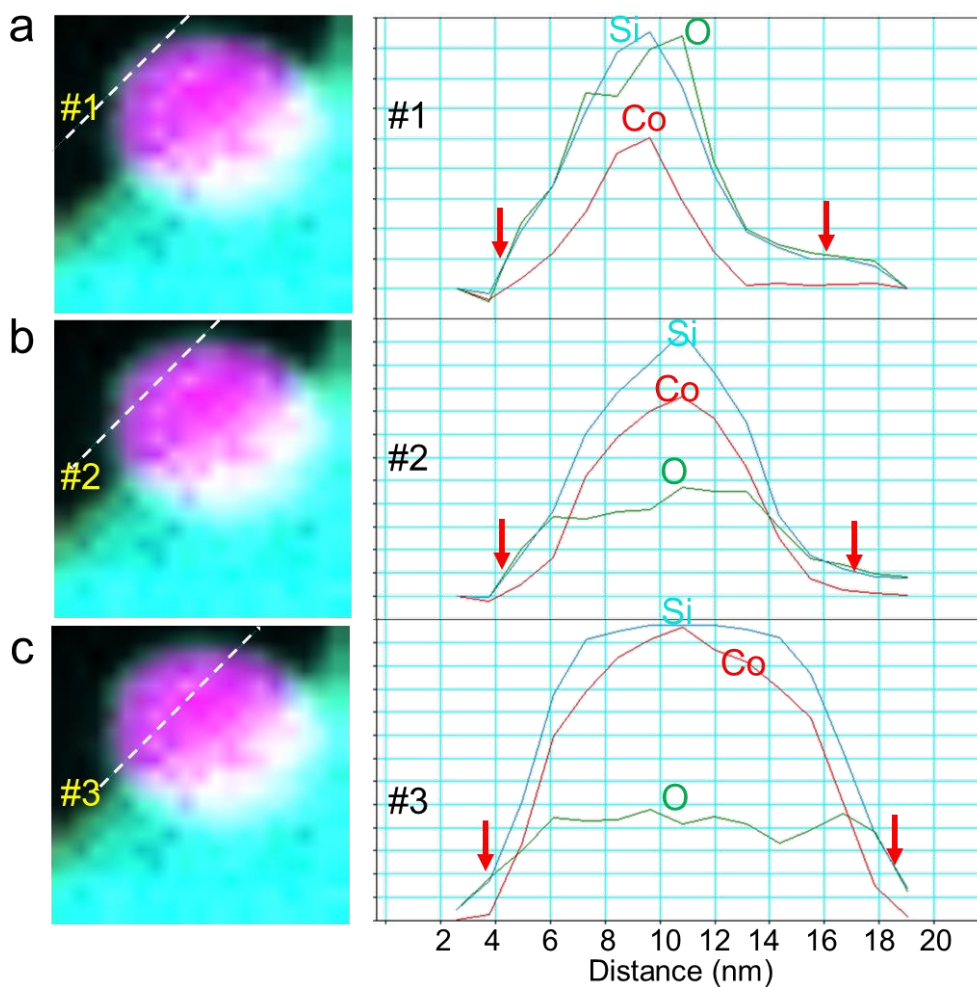

**Figure S7.** a–c, *In-situ* EELS elemental mapping of Si, O, Co on the same Co particle as shown in Figure 2a. Corresponding line scan profiles of EELS across the Co-overlayer indicated with #1–#3 in (a–c).

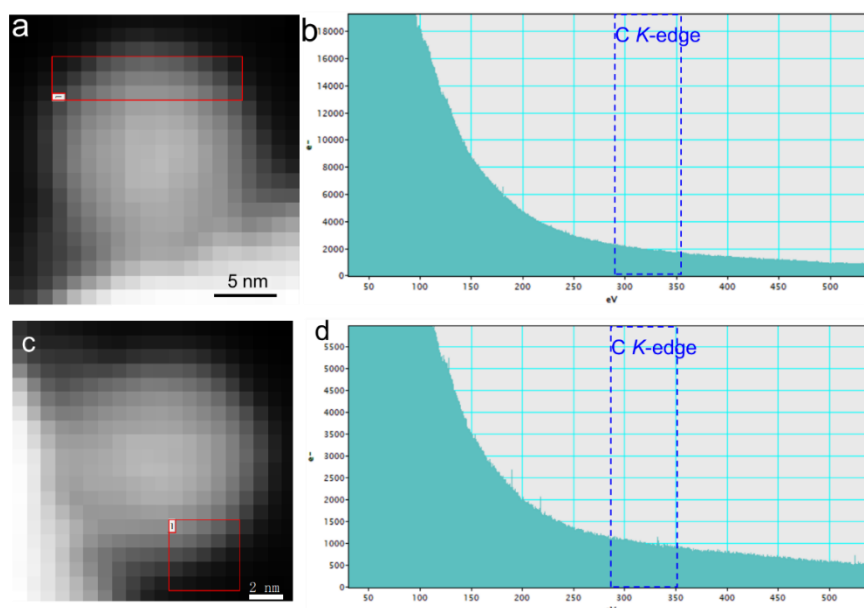

**Figure S8.** **a, c,** *In-situ* STEM-EELS image of a Co nanoparticles on SiO<sub>2</sub>/SiN<sub>x</sub> substrate annealing under H<sub>2</sub>/CH<sub>4</sub> (**a**) and CO (**c**) conditions. The particle in (**a**) is the same as shown in Figure 2a. **b, d,** Corresponding EELS spectrum of C *K*-edge obtained at the surface of Co nanoparticle.

The inversed FFT (IFFT) formed using spots of SiO<sub>2</sub> in corresponding FFT matched well with the simulated TEM contrast of quartz SiO<sub>2</sub> [10 $\bar{1}$ ] (Fig. S9d–f).

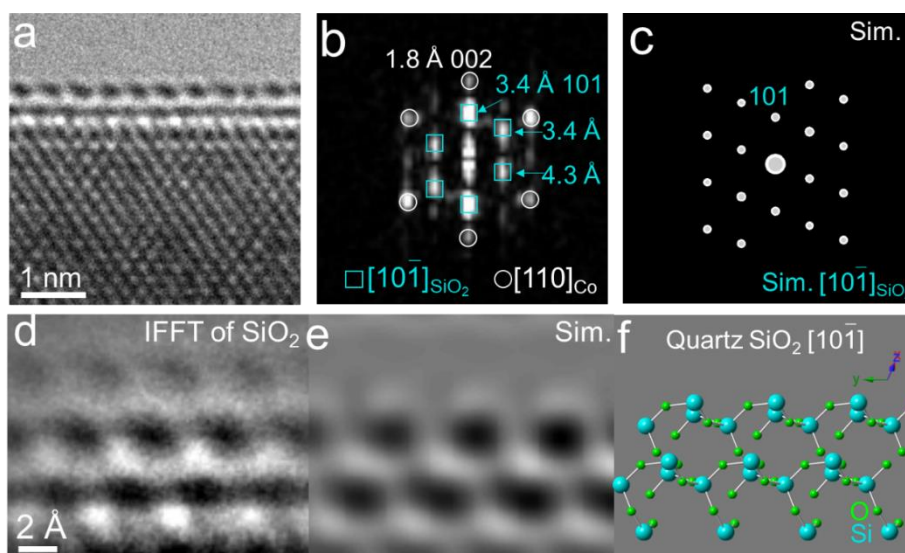

**Figure S9.** **a,** ETEM image of SiO<sub>2</sub>-Si-Co interface. **b,** FFT pattern as shown in Figure 3b. **c,** Simulated electron diffraction pattern of quartz SiO<sub>2</sub> along [10 $\bar{1}$ ] direction. **d–f,** IFFT formed using spots of SiO<sub>2</sub> in corresponding FFT (**d**) and simulated TEM image

(e) obtained from atomic structure model of quartz  $\text{SiO}_2$  [ $10\bar{1}$ ] (f).

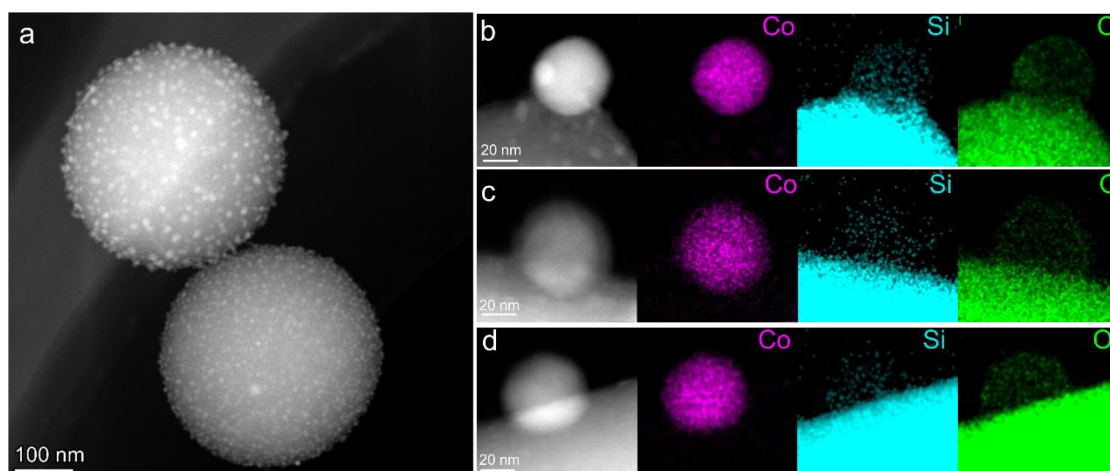

**Figure S10.** a–d, HAADF-STEM images and EDX elemental mapping of Co/SiO<sub>2</sub> after annealing under 10% H<sub>2</sub>/Ar at 750 °C for 6 h.

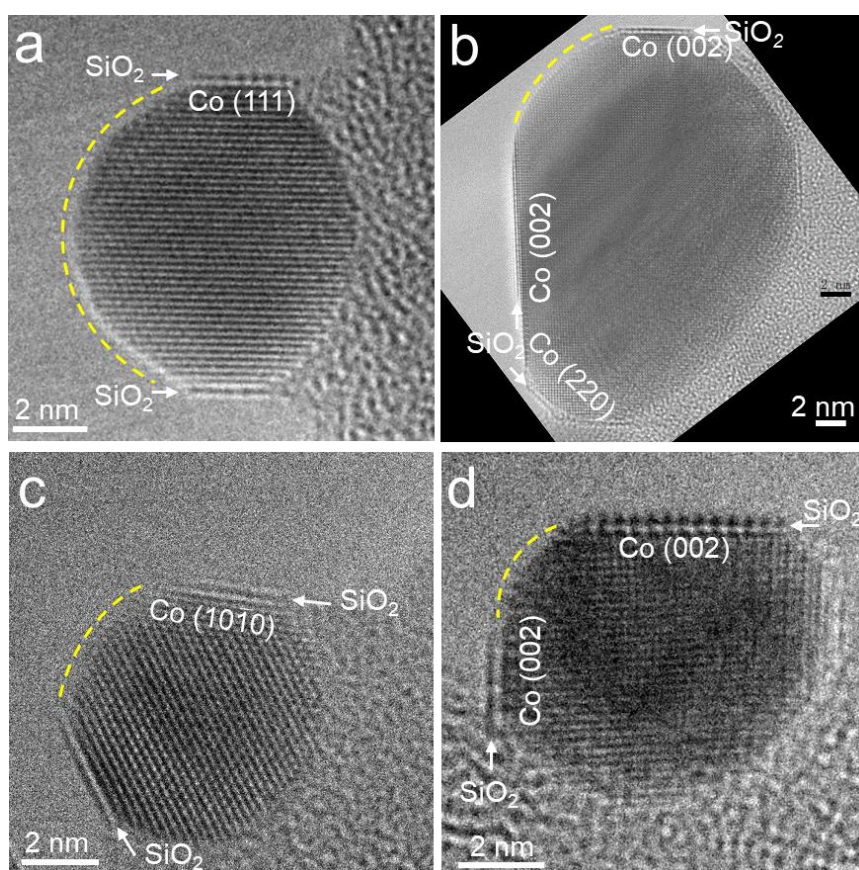

**Figure S11.** a–d, Single-shot ETEM images of Co nanocrystals with SiO<sub>2</sub> overlayer on flat facet with low index. The round surface consisting of high index crystal planes was marked by dashed line.

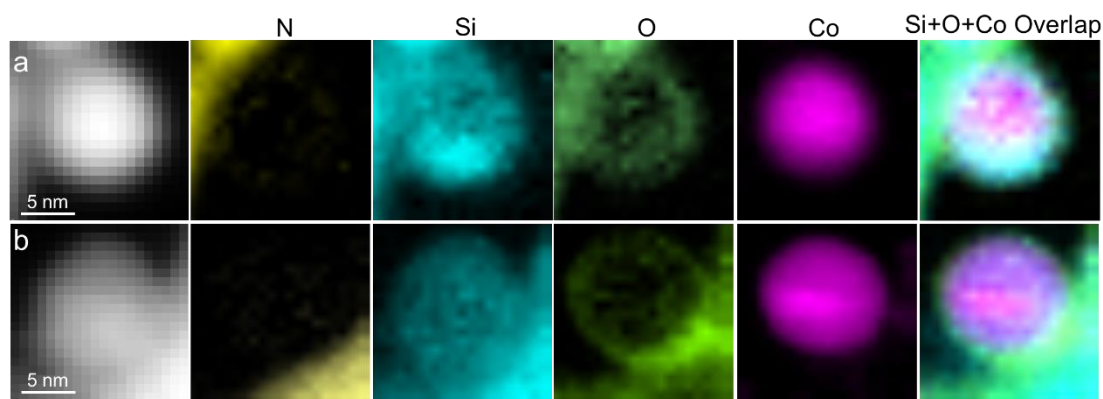

**Figure S12. *In-situ* STEM-EELS characterization.** **a, b**, STEM-EELS images of two Co nanoparticles on SiO<sub>2</sub>/SiN<sub>x</sub> in 3% H<sub>2</sub>/Ar (50 Pa) at 750 °C. Corresponding EELS elemental mapping of N *K*-edge, Si *L*<sub>2,3</sub>-edge, O *K*-edge, Co *L*<sub>2,3</sub>-edge, and their combinational images.

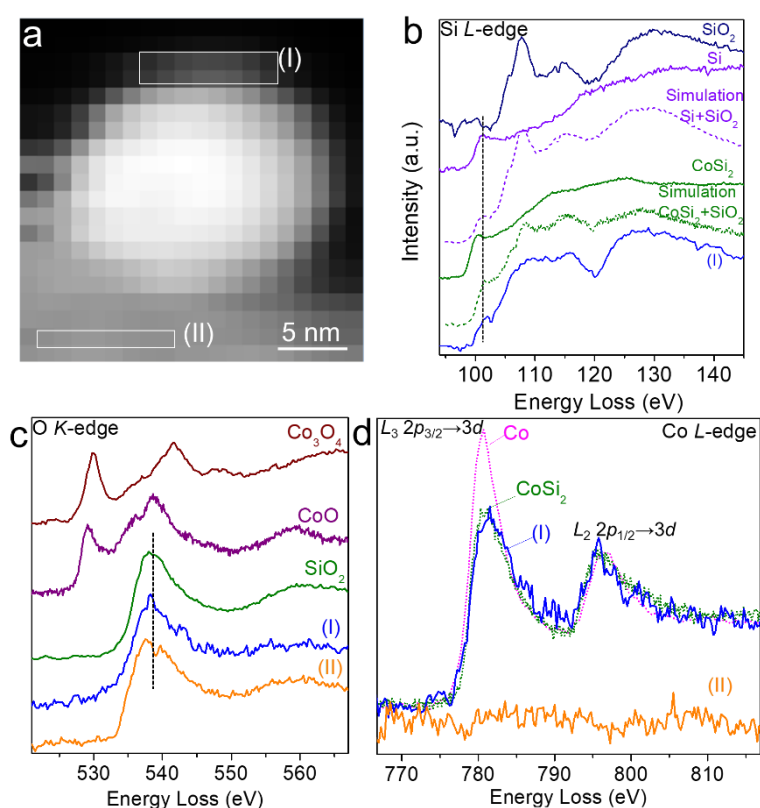

**Figure S13. *In-situ* STEM-EELS characterization.** **a**, SETM-EELS spectrum image showing a Co nanoparticle on SiO<sub>2</sub>/SiN<sub>x</sub> substrate in 3% H<sub>2</sub>/Ar at 750 °C. **b–d**, EELS spectra extracted from **(a, regions I and II)**, showing Si **(b)**, O **(c)**, and Co **(d)** signals from nanoparticle and substrate. Commercial Si, SiO<sub>2</sub>, and CoSi<sub>2</sub> were used as referenced samples, CoO, Co<sub>3</sub>O<sub>4</sub>, Co, and Si<sub>3</sub>N<sub>4</sub> from EELS database were used. All

the spectra were calibrated by using the zero-loss peak (0 eV). The EELS spectra of Co  $L$ -edge were normalized by the energy loss peak of Co  $L_2$ -edge.

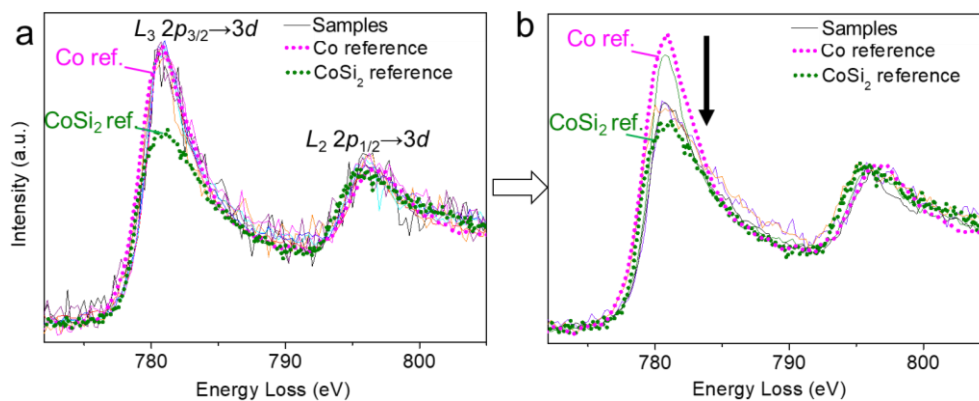

**Figure S14. a, b,** *In-situ* EELS Co  $L_{2,3}$  spectra of Co-SiO<sub>2</sub> before (a) and after (b) order-to-disorder transition of SiO<sub>2</sub>. The EELS spectra of different Co-SiO<sub>2</sub> nanoparticles and Co and CoSi<sub>2</sub> references were calibrated by the zero-loss peak (0 eV) and then normalized by the energy loss peak of Co  $L_2$ -edge.

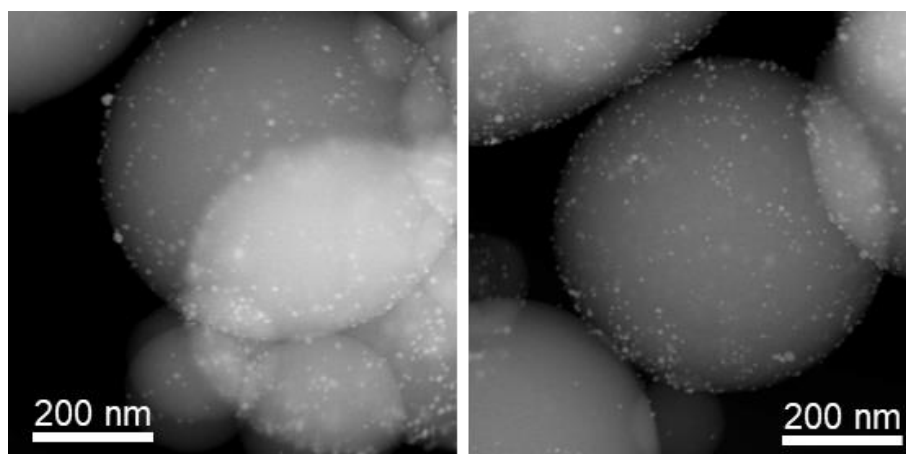

**Figure S15.** HAADF-STEM images of as-prepared Pt nanoparticles supported on SiO<sub>2</sub> spheres.



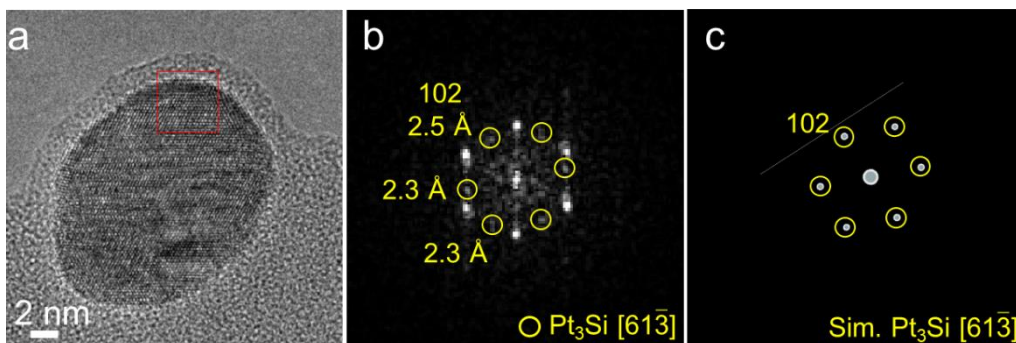

**Figure S16.** **a**, High-resolution TEM image of Pt nanoparticle supported on SiO<sub>2</sub>. **b**, FFT derived from region marked in **(a)**. **c**, Simulated FFT of Pt<sub>3</sub>Si [61 $\bar{3}$ ].

**Table S2.** Active surface area of Pt/SiO<sub>2</sub> catalyst annealed at 500-900 °C, which was characterized by CO adsorption. The loading amount of Pt was controlled to 3 wt% of the support.

| Catalyst reduction temperature (°C) | Active Pt surface area (m <sup>2</sup> /g-cat) |
|-------------------------------------|------------------------------------------------|
| 500                                 | 0.93                                           |
| 600                                 | 4.15                                           |
| 750                                 | 3.91                                           |
| 900                                 | 1.73                                           |

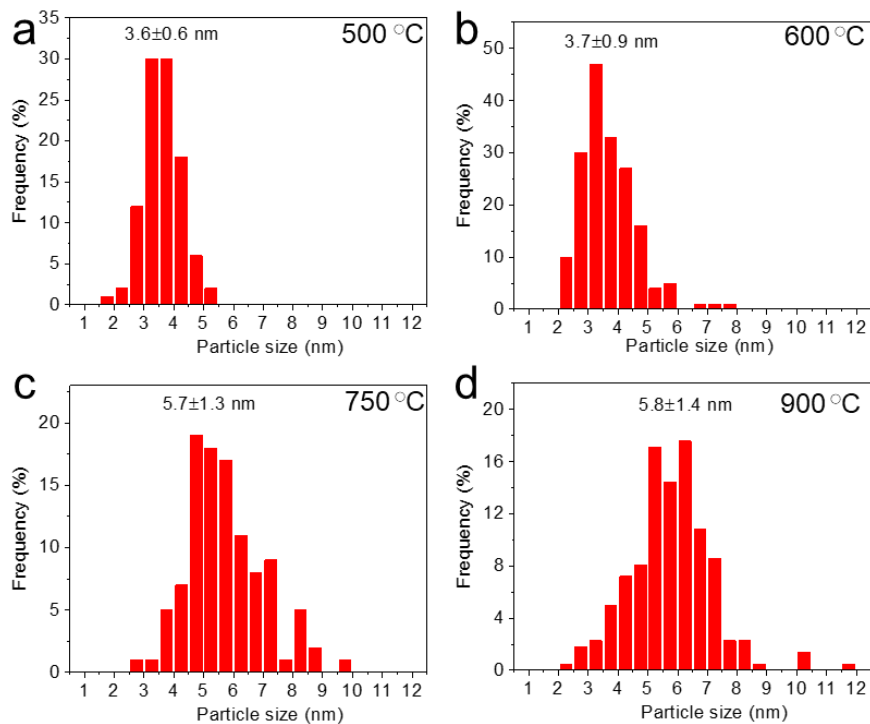

**Figure S17.** Distributions of Pt catalyst size calcined at 500 (a), 600 (b), 750 (c), and 900 °C (d). The Pt catalyst was supported on SiO<sub>2</sub> spheres. The averaged Pt particle size was also shown in each panel.

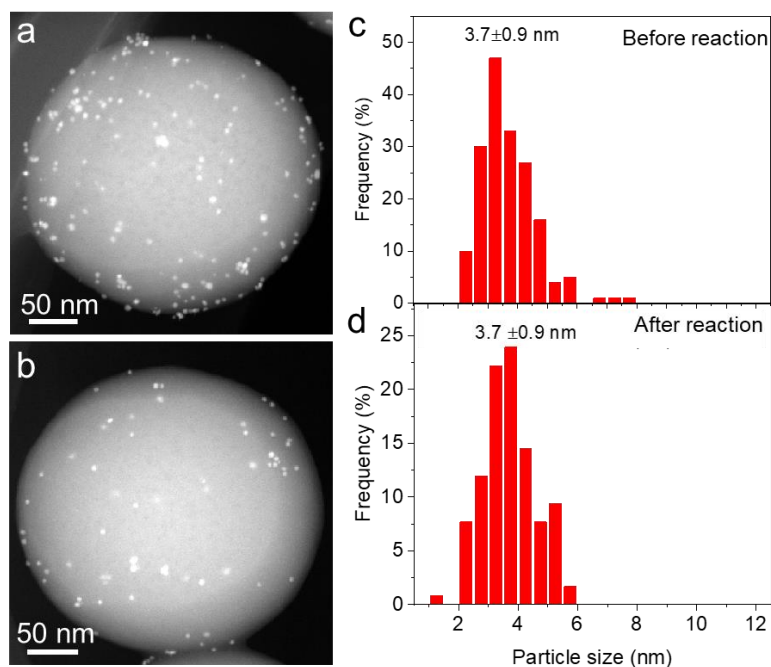

**Figure S18.** a, b, TEM images of Co/SiO<sub>2</sub> catalyst after hydrogenation reaction. c, d, Size distribution of Pt nanoparticles before (c) and after (d) reaction. Panel (c) is the same as in Fig. S17b.
